# Supplementary material for: Sirt1 sustains sonic hedgehog signaling to promote medulloblastoma progression through regulating Gli3 processing
Source: Research Square preprint supplement (doi:10.21203/rs.3.rs-7344210/v1), 2025-08-20
Supplement: Supplementary file 1 [file 9c6cd4bededbd568ae54d6e8.docx]

**Supplementary Fig. 1 qPCR analysis of *SmoA1*, *Gli1* and *Gli2* in these genes overexpressing MEF cells.**


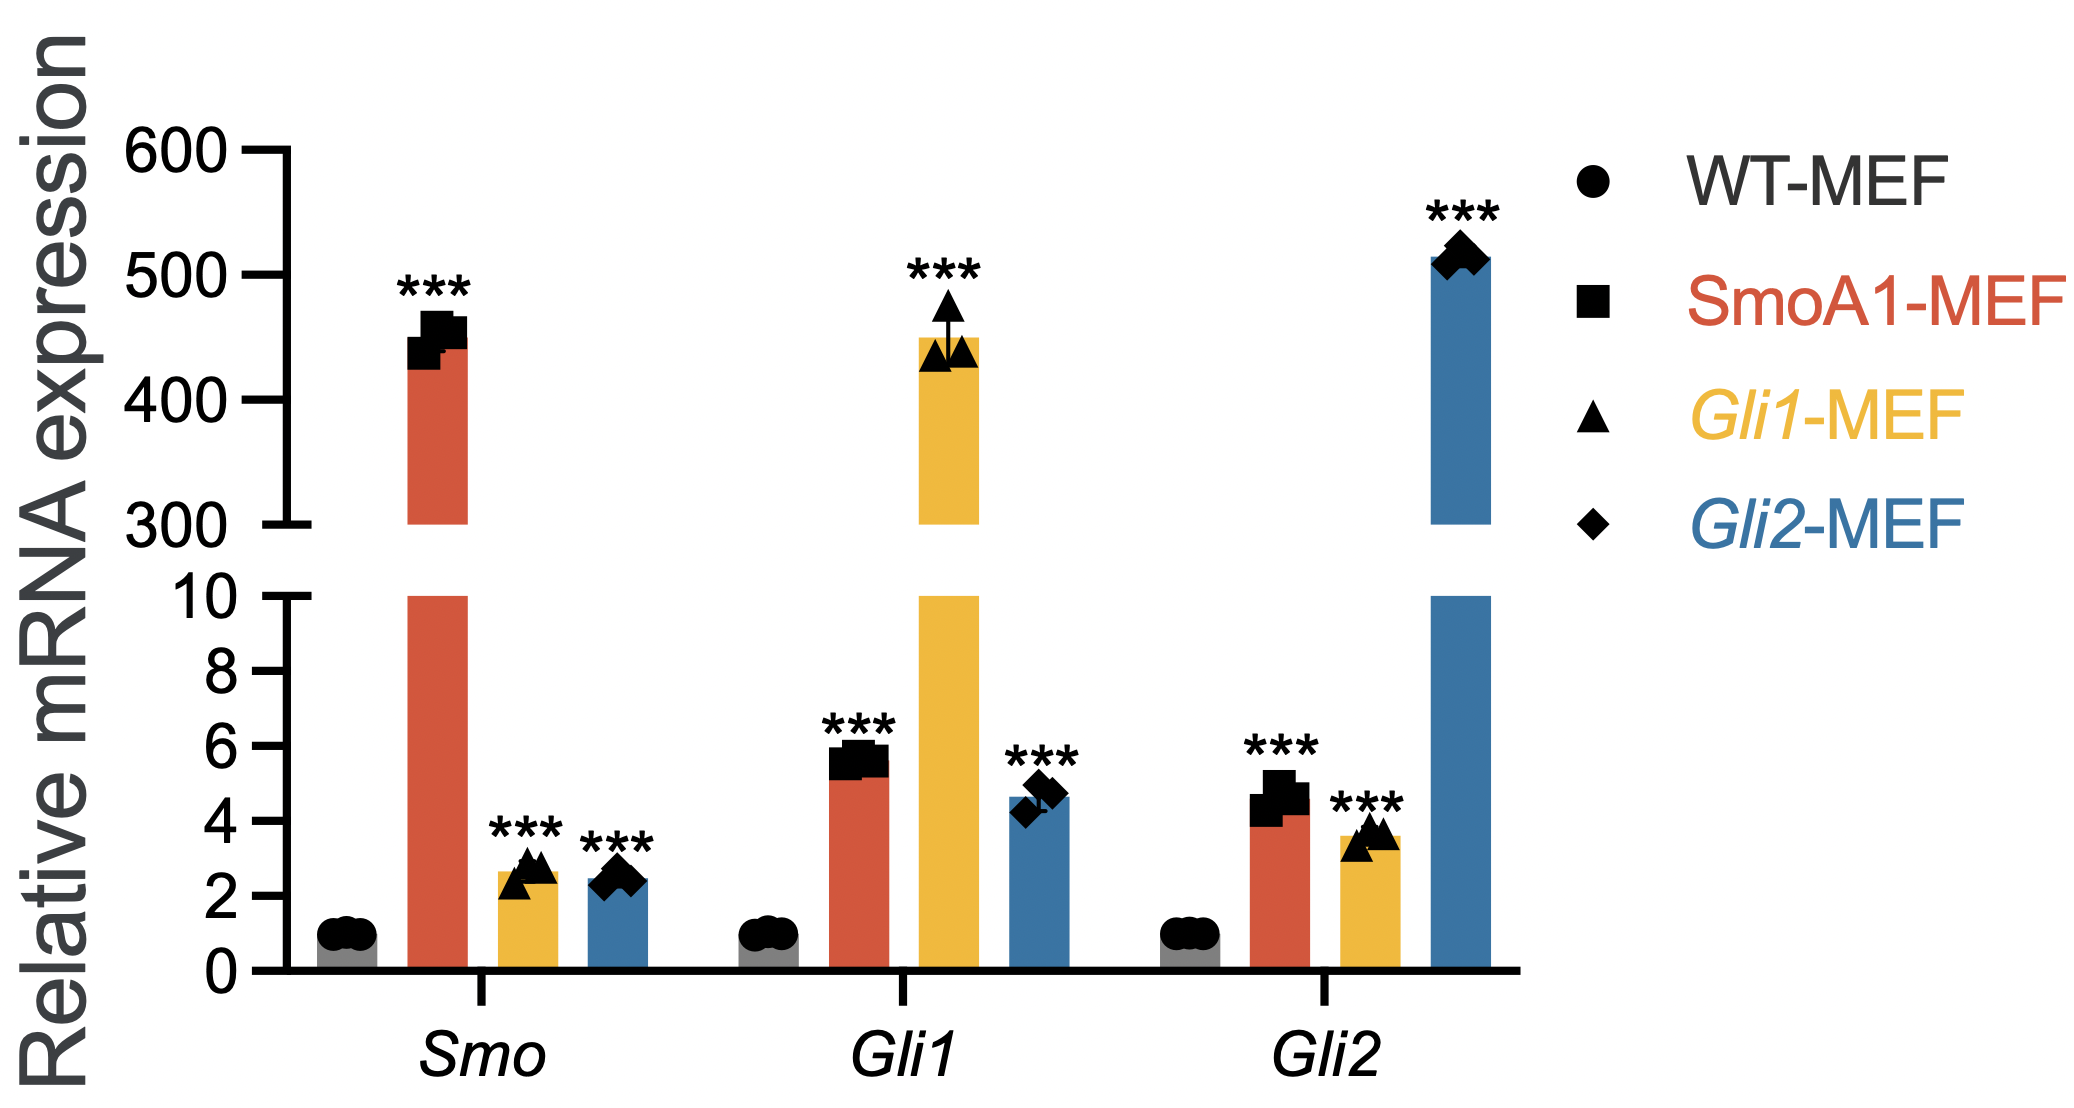


QPCR evaluation of the expression of *Smo*, *Gli1*, or *Gli2* in *SmoA1*, *Gli1*, or *Gli2* stably overexpressing MEF cells, WT-MEF cells served as control. ****P*<0.001 vs. WT-MEF

**Supplementary methods**

**The primers sequences (all for mouse specie) used in our qPCR experiments** were as follows:

*GAPDH* (forward: CATCACTGCCACCCAGAAGACTG; reverse: ATGCCAGTGAGCTTCCCGTTCAG);

*Gli1* (forward: CTCAAACTGCCCAGCTTAACCC); reverse: TGCGGCTGACTGTGTAAGCAGA);

*Gli2* (forward: GCCCTGGAGAGTCACCCTT; reverse: TGCACAGACCGGAGGTAGT);

*Ptch2* (forward: CTCCGCACCTCATATCCTAGC; reverse: TCCCAGGAAGAGCACTTTGC);

*Sfrp1* (forward: CAATACCACGGAAGCCTCTAAGC; reverse: GCTTGCACAGAGATGTTCAATG);

*Sirt1* (forward: GGAGCAGATTAGTAAGCGGCTTG; reverse: GTTACTGCCACAGGAACTAGAGG);

*Sirt2* (forward: CGAAGGAGTGACACGCTACATG; reverse: GGTGGTACTTCTCCAGGTTTGC);

*Sirt3* (forward: GCTACATGCACGGTCTGTCGAA; reverse: CAATGTCGGGTTTCACAACGCC);

*Sirt4* (forward: GGCGACGTGTTCCTCACTG; reverse: ACAAAGTCAACCTTGTCTGGG);

*Sirt5* (forward: ATCGCAAGGCTGGCACCAAGAA; reverse: CTAAAGCTGGGCAGATCGGACT);

*Sirt6* (forward: CAGTACGTCAGAGACACGGTTG; reverse: GTCCAGAATGGTGTCTCTCAGC);

*Sirt7* (forward: CTGGAGATTCCTGTCTACAACCG; reverse: AGTGACTTCCTACTGTGGCTGC)

*SmoA1* (forward: GAGGCTACTTCCTCATCAGAGG; reverse: GCTGAAGGTGATGAGCACAAAGC).

**Sequences for shRNAs are as following:**

Scrambled shRNA: TTCTCCGAACGTGTCACGT;

Sh*Sirt1*#1: CCGGAGTGAGACCAGTAGCACTAATCTCGAGATTAGTGCTACTGGTCTCACTTTTTTG;

Sh*Sirt1*#2: CCGGAGTGAGACCAGTAGCACTAATCTCGAGATTAGTGCTACTGGTCTCACTTTTTTG.
